1  
2 **Ontogenetic modifications produce similar phenotypes in distantly related click beetles**  
3 **(Coleoptera: Elateridae)**

4  
5 Dominik Kusy<sup>1,2</sup>, Michal Motyka<sup>1</sup>, and Ladislav Bocak<sup>1,3</sup>  
6

7  
8 <sup>1</sup>Biodiversity and Molecular Evolution, Czech Advanced Technology Research Institute, Slechtitelu  
9 27, 779 00 Olomouc, Czech Republic, <sup>2</sup>Department of Zoology, Faculty of Science, Palacky  
10 University, tr. 17. listopadu 50, Olomouc, Czech Republic; <sup>3</sup>Corresponding author, email:  
11 ladislav.bocak@upol.cz

---

12  
13 **Abstract**

14 The study analyzes the relationships of click beetles (Elateridae) *Paulusiella* Löbl, 2007, and  
15 *Analestesa* Leach, 1824 (= *Cebriognathus* Chobaut, 1899), both incapable of jumping, with soft-  
16 bodied habitus, and unknown females. Due to divergent morphology, their positions have been an  
17 uncertain issue. We use mitochondrial genomes to test their current placement in Cebriionini  
18 (=Cebriognathini) and Elaterinae *incertae sedis*, respectively. We recover *Paulusiella* as a sister to  
19 *Hemiops* Laporte, 1838 (Hemiopinae) and *Analestesa* as one of the serially splitting branches in  
20 Cardiophorinae, both with robust support. Paulusiellinae **subfam. nov.** is proposed for *Paulusiella*.  
21 *Analestesa* is transferred to Cardiophorinae, and Cebriognathini Paulus, 1981, an earlier synonym of  
22 Elaterinae: Cebriionini, is a synonym of Cardiophorinae Candèze, 1859. The click beetles affected by  
23 ontogenetic modifications converge to similar forms lacking derived states. As a result, their  
24 phylogenetic position cannot be reliably inferred by morphological analyses and needs to be validated  
25 by molecular data. Paulusiellinae and *Analestesa* represent two additional cases of the shift to  
26 incomplete sclerotization in elaterids raising the total number to six. The present transfers of extant  
27 taxa between subfamilies call for a cautious interpretation of morphology in other soft-bodied groups,  
28 including the taxa described from amber deposits.

29  
30 Key words: classification, molecular phylogeny, morphology, evolution, ontogeny.  
31

---

32  
33 **Introduction**

34 Click beetles (Elateroidea: Elateridae) are well known for their jumping adults (Ribak &  
35 Weihs 2011). Still, some click beetles lost their thoracic click mechanism and differ from their  
36 relatives in general appearance. Omalids, drilids (false firefly beetles), and plastocerids were  
37 separate families considered the relatives of fireflies, soldier- and net-winged beetles (Crowson 1972,  
38 Branham & Wenzel 2003, Lawrence et al. 2011). Only recently, they were included in Elateridae  
39 (Bocak et al. 2018, Kusy et al. 2019). Cebriionids (Elaterinae) traditionally contained other non-  
40 clicking, soft-bodied elaterids. Although cebriionids were earlier treated as a family (Crowson 1955),  
41 they are so slightly modified (Arnett 1949, Rattu 2016) that they were included in Elateridae since  
42 applying Hennig's phylogenetic systematics (Crowson 1981, Bouchard et al. 2011). Later, they were  
43 downranked to the tribe Cebriionini in Elaterinae (Kundrata et al. 2014). Still, their classification has  
44 never benefited from a molecular study, and the relationships of constituent genera have been poorly  
45 corroborated. Concerning the known effect of modified metamorphosis on the phenotype of elateroids  
46 (Kusy et al. 2019, 2021), reexamining the phylogenetic position of non-clicking elaterids is needed  
47 not only to update the classification but also to understand the evolution of ontogenetic modifications.

48 Metamorphosis is a crucial innovation that is supposedly connected with the enormous  
49 diversity of insects (Nicholson et al. 2014). The transition between larva, pupa and adult is a complex,  
50 fine-tuned cascade of steps (Jindra et al. 2015, Jindra 2019) that can be prematurely terminated. Then,  
51 some larval and pupal characteristics can persist in adults (Gould 1977, Bocak & Brlik 2008,  
52 McMahon & Hayward 2016, Bocek et al. 2019). In the most severely affected elateroids, the imaginal  
53 characters are not expressed, and larva-like females are sexually mature (Cicero 2008, Wong 1996,  
54 Masek et al. 2014, 2015, Makarov & Kazantsev 2022). The ontogenetic modifications are usually  
55 similar within a single group. Still, different levels are known in various lineages (Crowson 1972,  
56 McMahon & Hayward 2016).

57 The phenotypically divergent adults are weakly sclerotized, and never use the clicking  
58 mechanism known in their relatives (e.g., drilids, omalisids, cebrionids, etc.). Further, we can  
59 encounter shortened or vestigial elytra, sometimes connected with a loss of wings. The abdomen can  
60 be larviform (drilids), or at least the ventrites are loose (e.g., Dendrometrinae: Plastocerini; Kusy et al.  
61 2018). The incomplete metamorphosis results in the loss of phylogenetically younger traits in  
62 agreement with Baer's recapitulation law (Løvtrup 1978). The modified soft-bodied forms have been  
63 confusing to systematists till an independent source of phylogenetic information became available  
64 with the sequencing of DNA. Due to absent apomorphic traits, some affected lineages have been  
65 assigned inappropriate high ranks. Alternatively, the unrelated groups were merged into a single taxon  
66 (Lawrence et al. 2011, Kazantsev 2013). In such a way, the morphologists defined the earlier  
67 superfamily Cantharoidea, and the cantharoid clade in Elateroidea (Crowson 1972, Lawrence 1988,  
68 Lawrence et al. 2011).

69 There are several obstacles that have delayed the studies on modified elaterids. Most neotenic  
70 groups are rare compared to their close relatives, and obtaining individuals properly fixed for  
71 molecular analyses has not been easy. Additionally, some females often remain unknown. We only  
72 estimate that the females are affected by the paedomorphic syndrome from the morphology of males,  
73 the relationships, and the absence of females in contrast with numerous males deposited in  
74 collections. Wingless females remain in the soil, and some only expose the abdomen during the  
75 copulation (observed in *Cebrio*, [https://www.youtube.com/watch?v=MIEz6jHCgLo&ab\\_](https://www.youtube.com/watch?v=MIEz6jHCgLo&ab_channel=RobertoLascaro)  
76 [channel=RobertoLascaro](https://www.youtube.com/watch?v=MIEz6jHCgLo&ab_channel=RobertoLascaro) accessed on Nov. 3, 2022); Bocak et al. 2013, Bocek et al. 2018).

77 Our study reinvestigates the relationships of the soft-bodied forms placed in the tribe  
78 Cebrionini (Elaterinae). We revisit morphological evidence for the earlier proposed concept of  
79 cebrionids and look for the morphological traits that could potentially support the molecular  
80 relationships. We intend to show that morphologically divergent lineages may converge to similar  
81 phenotypes even if they are distantly related. The results affect the Linnean classification of  
82 investigated taxa. We believe that revising the traditional placement of extant soft-bodied elaterids  
83 might contribute to a better understanding of morphological evolution. We expect, analogically to  
84 click beetle phylogeny, further changes in the placement of other strongly modified groups. The  
85 difficulties with classifying extant soft-bodied forms should also be considered in works on fossils for  
86 which only morphological and often incomplete data are available.

87

## 88 **Methods**

89

90 The compilation of the dataset

91 The mitogenomic dataset was assembled from newly sequenced mitogenomes of *Cebrio* sp.,  
92 *Cebriorhipis* sp., *Analestesa arabica* (Paulus, 1981), *Paulusiella serraticornis* (Paulus, 1972),  
93 *Quasimus* sp., and *Hemiops* sp. The voucher numbers and complete locality data are reported in Tab.  
94 1. Further mitogenomic data were taken from the dataset published by Kusy et al. (2021).

95

96 Table 1. The list of newly sequenced samples. For the list of publicly available samples, see Supp.  
97 Tab. S1.

| Taxon                            | Voucher | Geographic origin                                                                                                                           |
|----------------------------------|---------|---------------------------------------------------------------------------------------------------------------------------------------------|
| <i>Paulusiella serraticornis</i> | G21004  | Iran, Kerman prov., Gebal Barez mts., 1345 m, 26 km N of Jiroft, wadi, 28°54'14"N 57°40'32"E, 27. May 2018, Vit Kuban leg., coll. V. Kuban. |
| <i>Analestesa arabica</i>        | G21003  | Kingdom of Saudi Arabia, Hieth, 2. May 1975, 40 km S of Riyadh, 24°18'9", 46°42'27", W. Büttiker leg., coll. L. Bocak.                      |
| <i>Cebrio</i> sp.                | G19010  | Italy, Sardinia, 2 km W of Irgutosu, 62 m, 39°31'31"N, 8°28'20"E, D. Ahrens & S. Fabrizzi leg., coll. L. Bocak.                             |
| <i>Cebriorhipis</i> sp.          | G22001  | Indonesia, Bali, Tamblingan Lake, 1000–1300 m, 8°15'33"S, 115°6'14"E. 2.–17. Feb 2004, S. Jakl leg., coll. D. Kusy.                         |
| <i>Quasimus</i> sp.              | R19010  | Japan, Kunimidake, 35°27'3 "N, 136°21'37"E, 14. May 2015, T. Sota leg., coll. L. Bocak.                                                     |
| <i>Hemiops</i> sp.               | G19002  | Malaysia, Perak, km 24 Rd Tapah-Ringlet, 230 m, 4°18'39"N, 101°19'52"E, 19. Apr. 2013, L. Dembicky leg., coll. L. Dembicky.                 |

98

99 Laboratory procedures, data handling, and morphological investigation

100 The total DNA was isolated from alcohol-preserved or dry-mounted samples. The vouchers were used  
101 for morphological investigation. They were dissected after short relaxation in 50% ethanol. The  
102 structures were treated in hot 10% KOH for a short time. The photographs were taken by a Canon M6  
103 Mark II camera attached to an Olympus SZX16 binocular microscope. Stacks were assembled using  
104 Helicon Focus software and processed in Photoshop 6.0. Vouchers are deposited in the collections of  
105 the collectors and of Biodiversity & Molecular Evolution at CATRIN, Olomouc.

106 DNA was extracted using Qiagen MagAttract HMW DNA extraction kit, and eluted in AE  
107 buffer. Short insert size library constructions (~320 bp) and subsequent paired-end (2 × 150 bp)  
108 sequencing of the samples were done by Novogene, Inc., Beijing, using Illumina NovaSeq 6000. Raw  
109 Illumina reads were quality checked with FastQC and filtered with fastp 0.21.0 (Chen et al. 2018)  
110 using -q 28 -u 50 -n 15 -l 50 settings. Filtered reads were used for final mitogenome assemblies. The  
111 mitogenomes were built de novo using the NOVOPlasty v.2.7.2 pipeline (Dierckxsens et al. 2017).  
112 NOVOPlasty was run with the default settings except the kmer value when we used a multi-kmer  
113 strategy with the following kmer sizes of 25, 39, 45, and 51. We used as seed the single fragment of  
114 *Oxyntopus* sp. cox1 gene available in GenBank (HQ333982). In the case of *Quasimus* sp., the  
115 mitochondrial fragments were mined from unpublished transcriptomic data that were mapped on the  
116 mitochondrial genome of *Cardiophorus signatus*, and manually curated in Geneious v.7.1.9. The  
117 newly assembled mitochondrial genomes were annotated using the MITOS2 webserver (Bernt et al.  
118 2013) with the invertebrate genetic code and RefSeq 63 metazoa reference. The annotation,  
119 circularization, and start + stop codons corrections of protein-coding genes (PCSGs) were performed  
120 manually in Geneious v.7.1.9. The sequences of newly produced mitochondrial genomes were  
121 deposited into the Mendeley database DOI:10.17632/73dmw4czm3.1.

122

123 Phylogenetic analyses

124 The six mitochondrial genomes of click beetles were merged for the purpose of phylogenetic analyses  
125 with thirty earlier published mitochondrial genomes (36 ingroup taxa and 1 outgroup, Kusy et al.  
126 2021). The dataset contained terminals belonging to ten subfamilies of Elateridae. The nucleotide  
127 sequences of protein-coding genes (PCG) were aligned using TransAlign (Bininda-Emonds 2005). In  
128 addition, nucleotide sequences of rRNA genes and translated amino acid sequences of PCGs were  
129 aligned with Mafft v.7.407 using the L-INS-i algorithm (Katoh & Standley, 2013). The aligned data  
130 were concatenated with FASconCAT-G v.1.04 (Kück & Longo 2014). We compiled the following  
131 datasets: (A) 13 PCG mtDNA and 2 rRNA mtDNA genes partitioned by gene or unpartitioned; (B) 13  
132 mitochondrial PCGs and by gene or unpartitioned; (C) 13 mitochondrial PCGs masked by degen

133 software (Steenwyk et al. 2020) partitioned by a gene or unpartitioned; (D) amino acid level analysis  
134 of 13 mitochondrial PCGs. The degree of missing data and overall pairwise completeness scores  
135 across all datasets was inspected using AliStat v.1.7. (Thomas et al. 2020) (Supp. Fig. S1).

136 Phylogenetic inferences were performed under maximum likelihood (ML) optimization using  
137 IQ-Tree2.1.2 (Minh et al. 2020), and Bayesian inference (BI) using PhyloBayes MPI v.1.8 (Lartillot  
138 et al. 2013). Before ML tree searches, best-fitting model selection for each partition was performed  
139 with ModelFinder (Chernomor et al. 2016, Kalyaanamoorthy et al. 2017) using the -MFP. All datasets  
140 were tested against a complete list of models. We used the edge-linked partitioned model for tree  
141 reconstructions (-spp option) allowing each partition to have its own rate.

142 Ultrafast bootstrap values (Hoang et al. 2018) were calculated for each tree using -bb 5000  
143 option. In the PhyloBayes analysis, unpartitioned datasets A, and D were analyzed under the site-  
144 heterogeneous mixture CAT + GTR +  $\Gamma$ 4 model for all searches. Two independent Markov chain  
145 Monte Carlo (MCMC) were run for each dataset. We checked for the convergence in the tree space  
146 with bpcomp program and generated output of the largest (maxdiff) and mean (meandiff) discrepancy  
147 observed across all bipartitions and generated a majority-rule consensus tree using a burn-in of 30%  
148 and sub-sampling every 10th tree. Additionally, we used the program tracecomp to check for  
149 convergence of the continuous parameters of the model.

150 We employed several tests to investigate alternative phylogenetic relationships, including the  
151 approximately unbiased AU-test (Shimodaira 2002), the p-SH (p-value of the Shimodaira-Hasegawa  
152 test) (Shimodaira & Hasegawa 1999), the KH-test (one-sided Kishino-Hasegawa test) (Kishino &  
153 Hasegawa 1989), the p-WKH (p-value of weighted KH test), the p-WSH (p-value of weighted SH  
154 test), c-ELW (Expected Likelihood Weight) (Strimmer & Rambaut 2002), and bp-RELL (bootstrap  
155 proportion using RELL method) (Kishino et al. 1990). To evaluate the hypothesized placement of  
156 focal taxa (*Analestesa arabica*, *Cebriorhipis* sp., and *Paulusiella serraticornis*) within Elaterinae, we  
157 tested the maximum likelihood (ML) tree topology against three alternative topologies suggested by  
158 earlier classifications: (A) *Analestesa arabica* as sister to *Cebrio* and *Cebriorhipis*, (B) *Paulusiella*  
159 *serraticornis* as sister to *Cebrio* and *Cebriorhipis*, and (C) the clade containing all focal taxa. IQ-  
160 TREE2 (Minh et al. 2020) was used to perform all tests, with per-site log-likelihoods calculated using  
161 the --test-weight --test-au --sitelh parameters and 10,000 replications

162

## 163 Results

164

### 165 Molecular phylogeny

166 The Bayesian and maximum likelihood mitogenomic analyses indicate high support for the polyphyly  
167 of Cebriionini in the traditional sense (Figs. 1A, B; Supp. Figs. S2-S11). Only *Cebrio* sp. and  
168 *Cebriorhipis* sp. are members of Elaterinae (BS 99%, PP 0.97). *Paulusiella serraticornis* was  
169 regularly a sister to *Hemiops* sp. (BS 100%, PP 1.00). Still, the clade was variably a sister to the  
170 remaining elaterid subfamilies or a sister to the non-Elaterinae subfamilies (Fig. 1A, B, Supp. Figs.  
171 S2-S11). *Analestesa arabica* was firmly placed within Cardiophorinae (BS 100%, PP 1.00) as the  
172 second split following *Globothorax femoralis*. The position of Negastrinae as a putative sister of  
173 Cardiophorinae was recovered only by some analyses (Supp. Figs. S5, S6, S8). Alternatively, the  
174 genus was found as a sister to the Agrypninae (Fig. 1A), or the Cardiophorinae + Agrypninae clade  
175 (Fig. 1B). No analysis suggested alternative positions for the focal taxa. The tests rejected the  
176 relationships of *Paulusiella* and *Analestesa* with Cebriionini (*Cebriorhipis* and *Cebrio*; Elaterinae;  
177 Tab. 2). We separately considered both genera in Cebriionini, and alternatively, either of them as a  
178 sister to *Cebrio* and *Cebriorhipis* (Tab. 2). We did not test the relationships between subfamilies and  
179 the monophyly of Elateridae as the dataset does not provide enough support for the deepest  
180 relationships.

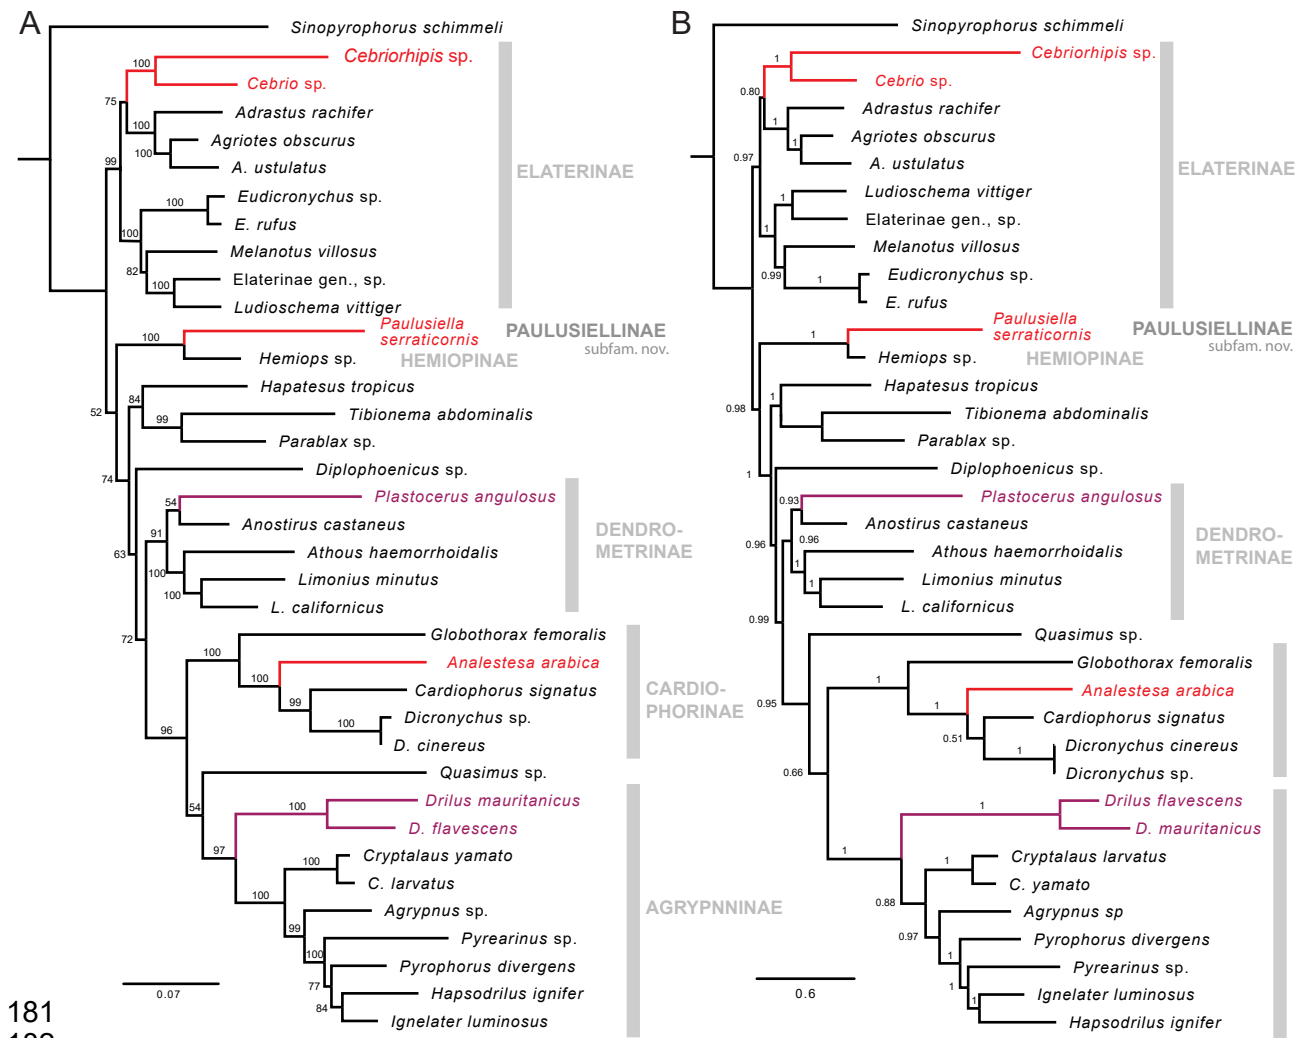

181

182

183

184 **Figure 1.** The mitogenomic relationships of soft-bodied and/or non-clicking genera *Paulusiella*,  
 185 *Cebrio*, *Scaptolenus*, *Analestesa*, *Plastocerus*, *Drilus*, and their clicking relatives. The numbers at  
 186 branches designate bootstrap values and posterior probabilities. A – the maximum likelihood analysis  
 187 of thirteen protein-coding mitochondrial genes at the nucleotide level with coding masked by the  
 188 degen software and partitioned by genes. B – The Bayesian analysis using PhyloBayes at the  
 189 nucleotide level. The trees with full-length branches and the results of additional analyses are shown  
 190 in Supp. Figs. S2–S11. Red – the taxa earlier placed in Cebriorhini; magenta – non-clicking elaterids  
 191 earlier placed in families Drilidae and Plastoceridae.

192

193

194

## 195 Morphology

196

### 197 *Paulusiella serraticornis* (Paulus, 1972)

198 *Escalerina serraticornis* Paulus, 1972: 38 (in Karumiidae; now Dascillidae: Karumiinae).

199 (Figs. 2A–P)

200

### 201 Redescription

202 Male. Body 5–7 mm long, slender, slightly flattened, light brown colored, vestiture of upper surfaces  
 203 with erect, long bristles (Figs. 2A–C).

204  
205  
206  
207  
208  
209  
210  
211

**Table 2.** Results of the alternative tree topologies likelihood testing. Aa: *Analestesa arabica*; Ce: *Cebrio* sp.; Cr: *Cebriorhipis* sp.; Ps: *Paulusiella serraticornis*; deltaL: logL difference from the maximal logL in the set; bp-RELL: bootstrap proportion using REll method; p-KH: p-value of one-sided Kishino–Hasegawa); p-SH: p-value of Shimodaira–Hasegawa test; p-WKH: p-value of weighted KH test; p-WSH: p-value of weighted SH test; c-ELW: Expected Likelihood Weight; p-AU: p-value of approximately unbiased (AU) test. Bold text represents the accepted test.

| Topology        | logL             | deltaL      | bp-RELL      | p-KH         | p-SH         | p-WKH        | p-WSH        | c-ELW        | p-AU         |
|-----------------|------------------|-------------|--------------|--------------|--------------|--------------|--------------|--------------|--------------|
| <b>ML</b>       | <b>-79060.25</b> | <b>0.00</b> | <b>0.823</b> | <b>0.826</b> | <b>1.000</b> | <b>0.826</b> | <b>0.994</b> | <b>0.819</b> | <b>0.820</b> |
| <b>PB</b>       | <b>-79069.89</b> | <b>9.64</b> | <b>0.177</b> | <b>0.174</b> | <b>0.570</b> | <b>0.174</b> | <b>0.370</b> | <b>0.181</b> | <b>0.181</b> |
| (Aa(Ce,Cr))     | -79486.96        | 426.70      | 0.000        | 0.000        | 0.000        | 0.000        | 0.000        | 0.000        | 0.000        |
| (Ps(Ce,Cr))     | -79109.91        | 49.66       | 0.000        | 0.000        | <b>0.098</b> | 0.000        | 0.000        | 0.000        | 0.000        |
| (Ps(Aa(Ce,Cr))) | -79532.71        | 472.46      | 0.000        | 0.000        | 0.000        | 0.000        | 0.000        | 0.000        | 0.000        |

212  
213  
214  
215  
216  
217  
218  
219  
220  
221  
222  
223  
224  
225  
226  
227  
228  
229  
230  
231  
232  
233  
234  
235  
236  
237  
238  
239  
240

Head slightly declined, transverse, with small antennal sockets, including eyes greater than prothoracic width, gradually narrowed posteriorly. Frons and vertex flat, with lateral carinae behind antennal pits, without ocelli (Figs. 2F, G). Eyes protuberant, rounded, finely faceted. Antennal insertions widely separated, covered by protuberant edge from above (Fig. 2B). Anterior edge of clypeus straight (Fig. 2C), gular sutures narrowly separated, and cervical sclerites well-sclerotized (Fig. 2F). Antennae reaching elytral humeri, antennomere 1 robust, long, antennomere 2 small, but longer than width, antennomeres 4-10 flabellate, terminal antennomere flat (Fig. 2D). Labrum concealed beneath clypeus; mandibles robust, curved, with dorso- and ventrolateral edges (Fig. 2E). Mandibular apex unidentate, incisor edge simple, without mola (Figs. 2F, G), maxilla with setose mala; maxillary palpi slender, 4-segmented, apical palpomere cylindrical; labium tiny, labial palpi 3-segmented, cylindrical (Fig. 2F).

Prothorax transverse (Fig. 2B), pronotum without carinae, maximum width 1.23 times length, widest in anterior third, only slightly narrower at base, sides sinuate (Figs. 2B, J). Prothorax basally narrower than elytral bases; lateral pronotal carina visible posteriorly. Posterior angles of pronotum strongly acute (Fig. 2K). Posterior edge of pronotum sinuate. Prosternum about as long as prosternal process, process long slender, edge curved in lateral view (Figs. 2C, K); apex of prosternal process does not reach mesosternal pit (Fig. 2L); promesothoracic clicking mechanism non-functional; procoxal cavities open, narrowly separated (Fig. 2C). Elytra cover whole abdomen, tapering to apex, widest at humeri, without apparent costae or rows of punctures (Fig. 2I). Elytra free apically (Fig. 2A), Elytral pleuron very short. Scutellum well developed; abruptly elevated; anteriorly straight, posteriorly broadly rounded and surpassing elytral surface, anterior edge of mesoventrite rounded (Fig. 2H), meso- and meta coxal cavities narrowly separated. Metasternum long, discrimen complete, posterior transverse suture apparent, posterior margin deeply emarginate between coxae. Hind wing present.

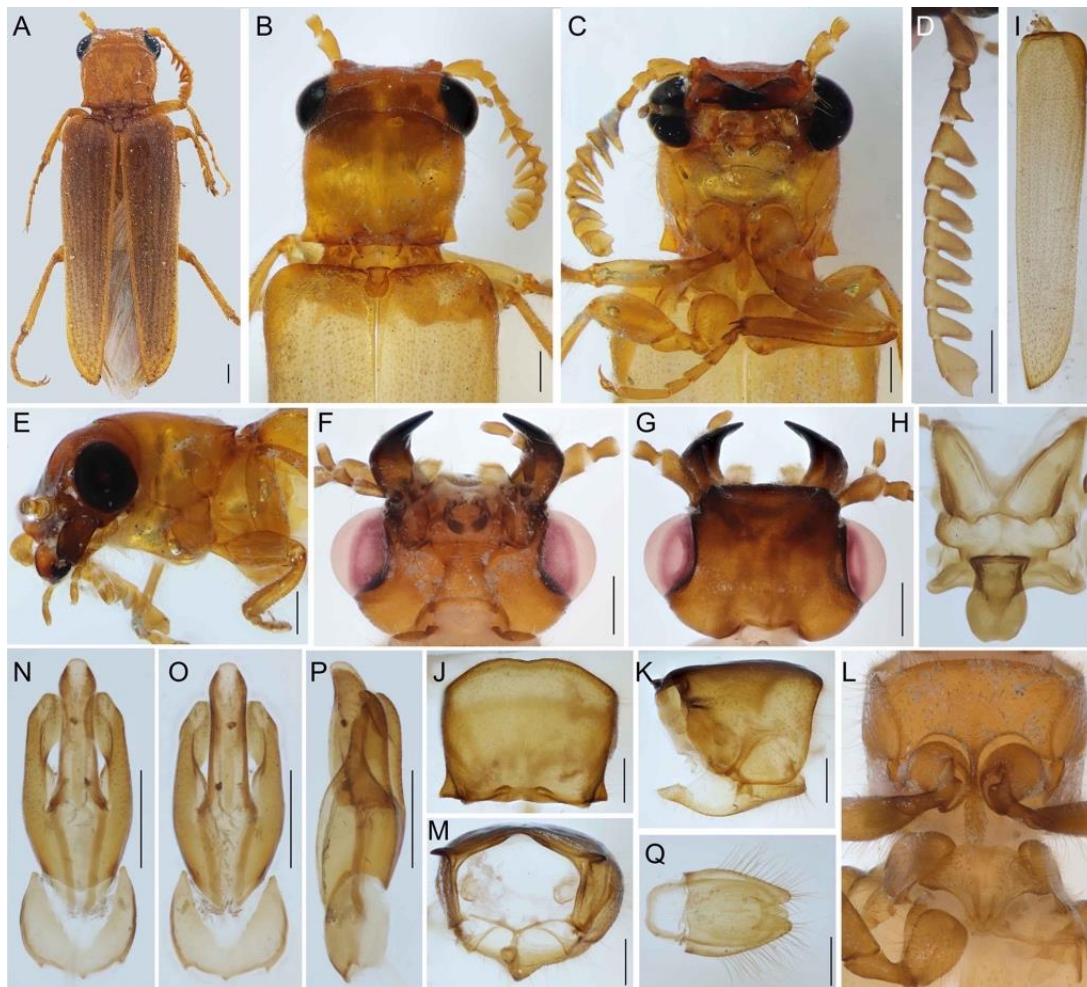

241

242

243 **Fig. 2.** *Paulusiella serraticornis* from Iran. A – general appearance, dorsal view; B, C – frontal part  
244 of the body, dorsally and ventrally; D – antenna; E – head and pronotum in lateral view; F, G – head,  
245 ventral and dorsal view; H – mesonotum; I – elytron; J–L –pronotum, dorsally, laterally, posterior  
246 view, M prosternal process, and mesosternal pit; N–P male genitalia, ventrally, dorsally, laterally;  
247 Q – terminal abdominal segments. Scales 0.5 mm.

248

249 Legs slightly compressed, with long, gradually widened trochanters, femoral attachments  
250 oblique; femora twice wider than tibiae (Fig. 2C), tibiae with simple outer edge and two long apical  
251 spines; tarsomeres slender, five segmented, without ventral pads, claws paired, long, slender, and  
252 simple.

253 Abdomen with six visible abdominal ventrites, ventrite 1 divided by metacoxae, ventrite 2  
254 without process; penultimate tergite deeply emarginate, ultimate tergite very small, narrow (Fig. 2Q).  
255 Male genitalia trilobate; symmetrical. Phallus stout, short, basally merged with parameres (Figs. 2N–  
256 P).

257 Females of all species unknown.

258

259 Biology, distribution and species diversity

260 All species have been reported from semidesert ecosystems of southwestern Asia, and the highest  
261 diversity is known from Iran. Males are commonly collected at the light. The biology is unknown, and  
262 the larvae and females are presumably endogenous. The mite species *Trochometridium kermanicum*  
263 Mortazavi & Hajiqanbar, 2011 was found on *Paulusiella* sp. in Iran (Mortazavi et al. 2011).

264 The genus contains six species: *P. serraticornis* (Paulus, 1972) (Iran); *P. richteri* (Mandl,  
265 1974) (Iran); *P. fossulatipennis* (Mandl, 1974) (Pakistan); *P. pallida* (Mandl, 1974) (Iran); *P.*  
266 *holzschuhi* (Mandl, 1979) (Iran); *P. sweihana* (Geisthardt, 2009) (United Arab Emirates).

267

268 ***Analestesa arabica* (Paulus, 1981)**

269 *Cebriognathus arabicus* Paulus, 1981: 261.

270 (Figs. 3A–P)

271

272 Redescription

273 Male. Body 6 mm long, slender, slightly flattened, light brown colored, vestiture dense and short (Fig.  
274 3A).

275 Head prognathous, slightly transverse, including eyes equals prothoracic width. gradually  
276 narrowed posteriorly; dorsally flat, without ocelli (Figs. 3B–D). Eyes slightly protuberant, rounded,  
277 finely faceted. Antennal insertions widely separated, covered by protuberant edge from above (Figs.  
278 3B, C, E); clypeus concave (Fig. 3C), gular sutures narrowly separated, and cervical sclerites  
279 sclerotized (Fig. 3D). Antennae reaching mid of elytra, antennomere 1 robust, long, antennomere 2  
280 small, antennomeres 4–11 filiform, terminal antennomere shorter than preceding one (Fig. 3I).

281 Labrum concealed beneath clypeus; mandibles robust, abruptly curved (Fig. 3E). Mandibular apex  
282 and incisor edge simple, maxilla with setose mala; maxillary palpi slender, 4-segmented, apical  
283 palpomere parallel-sided; labium tiny, labial palpi 3-segmented (Fig. 3D).

284 Prothorax transverse, pronotum without carinae, maximum width 1.18 times length, widest in  
285 middle, sides convex (Fig. 3B). Prothorax basally narrower than elytral bases; lateral pronotal edge  
286 absent (Figs. 3F–H). Posterior angles of pronotum short, acute. Posterior edge of pronotum sinuate.  
287 Prosternum slightly longer than prosternal process, process slender, edge curved in lateral view (Figs.  
288 3F, G); procoxal cavities open, narrowly separated (Fig. 3D); promesothoracic clicking mechanism  
289 non-functional. Elytra cover abdomen, tapering to apex, widest at humeri, with inconspicuous costae  
290 (Fig. 3A). Elytra free apically, independently rounded. Scutellum well developed; widest anteriorly  
291 (Fig. 3A) Hind wing well developed.

292 Legs slightly compressed, with long trochanters (Fig. 3D), tibiae with simple outer edge,  
293 bearing setae, and two apical, long spines; tarsomeres slender, five segmented, without ventral pads,  
294 claws paired, long, slender, and simple.

295 Abdomen with six free abdominal sternites, ventrite 1 entire, with inter-coxal process;  
296 penultimate tergite simple, ultimate tergite large (Fig. 3P). Male genitalia trilobate; symmetrical.  
297 Phallus slender, short (Figs. 3K, M).

298 Females of all species unknown, putatively incapable of flight.

299

300 ***Cebrio igelmimen* Rattu et François, 2021**

301 (Fig. 4A)

302

303 Remark

304 The *Cebrio* females are rare in collections. Recently, two females were described in detail by Rattu  
305 (2016) and Rattu & François (2021). Fig. 4A shows the female *Cebrio igelmimen* (photo provided by  
306 R. Rattu).

307 The *Cebrio* females differ from conspecific males in several traits: substantially larger body,  
308 small eyes, short antennae, and legs, especially tarsi are substantially shorter than in

309

310

311



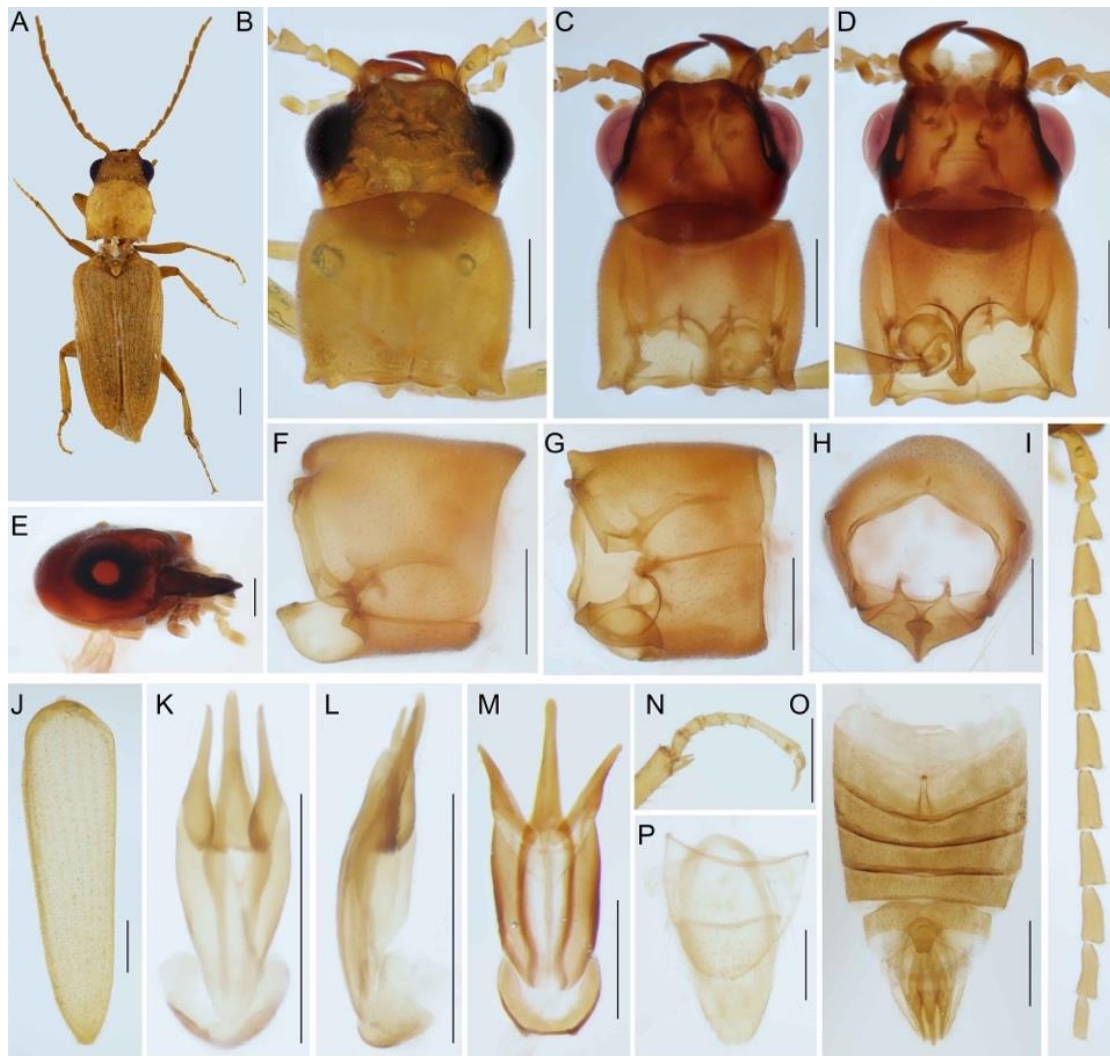

312  
313

314 **Fig. 3.** *Analestesa arabica* (Paulus, 1981) from Saudi Arabia (except for Fig. 3I). A – general  
315 appearance, dorsal view; B–D – frontal part of the body, dorsally (B, C) and ventrally); E – head in  
316 lateral view; F–H – pronotum, lateral, dorsolateral, and posterior view; I – antenna; J – elytron; K, M  
317 – male genitalia, ventrally, dorsally, laterally; l – Male genitalia of *Dicronychus cinereus* (Herbst,  
318 1784); N – hind tarsus and apical part of tibia; O – abdomen, ventral view; P – terminal abdominal  
319 segments. Scales 0.5 mm.

320  
321

322 males (compare Figs. 4A and 4L), often shortened elytra, physogastrous abdomen, weak  
323 sclerotization of the cuticle.

324  
325

### 326 *Cebriorhipis* sp.

327 (Fig. 4B–M)

328

#### 329 Description

330 Male. Body 12–14 mm long, robust, slightly flattened, brown colored, vestiture dense, long short  
331 (Figs. 4B–E).

332

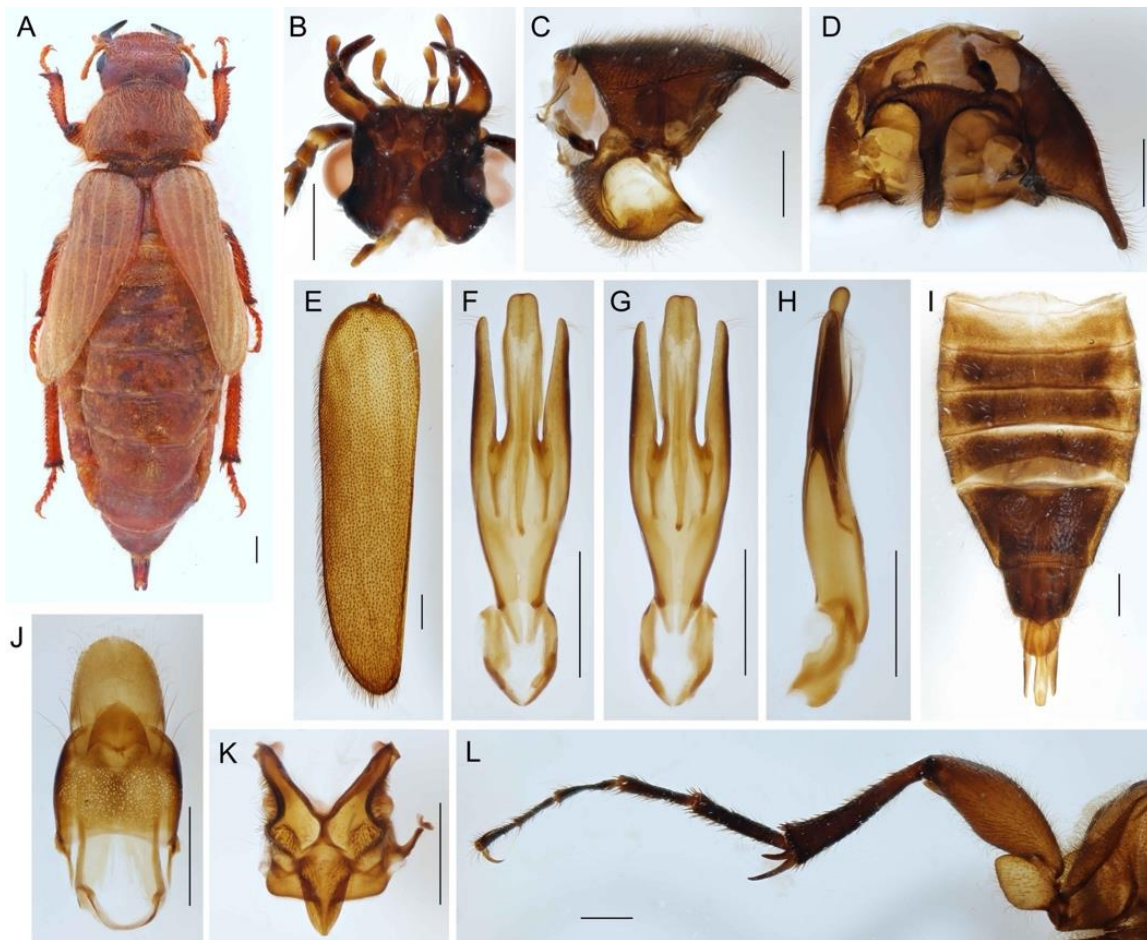

333  
334

335 **Fig. 4.** A – *Cebrio (Tibesia) igelmimen* Rattu et François, 2021 from Morocco, female, general  
336 appearance. *Cebriorhipis* sp. from Bali. B – head, ventral view; C, D – pronotum, lateral and  
337 ventral view; E – elytron; F–I male genitalia, ventral, dorsal and lateral view; J – abdomen, ventral view; K –  
338 terminal abdominal segments; L – mesoscutellum; M – metathoracic leg. Scales 1.0 mm. Fig. 4A was  
339 published by Rattu & François (2021) and is here reprinted with permission of the authors who retain  
340 the copyright of this photo.

341

342 Head prognathous to slightly declined, transverse, including eyes narrower than prothoracic  
343 width, gradually narrowed posteriorly (Fig. 4B). Eyes slightly protuberant, rounded, ocelli absent.  
344 Antennal insertions widely separated, gular sutures narrowly separated, and cervical sclerites  
345 sclerotized (Fig. 4B). Antennae slender, shortly flabellate, reaching almost mid of elytra, antennomere  
346 1 robust, long, antennomeres 2 and 3 short, antennomeres 4–11 with short lamella, terminal  
347 antennomere similar length as preceding one. Mandibles robust, abruptly curved (Fig. 4E).  
348 Mandibular apex and incisor edge simple, maxilla with short setose mala; maxillary palpi slender, 4-  
349 segmented, apical palpomere parallel-sided; labium tiny, labial palpi 3-segmented (Fig. 4B).

350 Prothorax transverse, pronotum without carinae, maximum width 1.5 times length, widest at  
351 posterior angles, sides convex (Figs. 4C, D). Prothorax basally narrower than elytral bases; lateral  
352 pronotal edge conspicuous in whole length (Fig. 4C). Posterior angles of pronotum ling, acute.  
353 Prosternal process four times longer than prosternum (Fig. 5D); procoxal cavities open, narrowly  
354 separated; promesothoracic clicking mechanism non-functional (Fig. 4D). Elytra cover abdomen,  
355 tapering to apex, widest at humeri, with inconspicuous costae (Fig. 4E). Elytral suture almost  
356 complete. Scutellum well developed; pointed posteriorly (Fig. 4K) Hind wings well developed.

357           Legs slightly compressed, with tarsi longer than femora and tibiae; slender pro- and  
358 mesotrochanters and widened metathoracic trochanters (Fig. 4L), tibiae with simple outer edge  
359 bearing setae, and two apical, long spines; tarsomeres slender, five segmented, without ventral pads,  
360 claws paired, long, slender, and simple (Fig. 4L).

361           Abdomen with seven free abdominal sternites, ventrite 1 entire, without inter-coxal process;  
362 penultimate tergite simple (Fig. 4J). Male genitalia trilobate; symmetrical. Phallus robust, basally  
363 fused with parameres (Figs. 4F–H). Females of *Cebriorhipis* unknown.

364

365

## 366 **Taxonomy**

### 367 **Paulusiellinae Kusy, Motyka & Bocak, new subfamily**

368

369 Type genus

370 *Paulusiella* Löbl, 2007 (monotypic).

371 =*Paulusiella* Mandl, 1974 (invalid name).

372

373 Diagnosis

374 The erection of the new subfamily is based on molecular relationships that recovered *Paulusiella* as a  
375 sister to *Hemiops* Laporte, 1838 (Elateridae: Hemiopinae; Fig. 1). The subfamily is monogeneric, and  
376 the description of *Paulusiella serraticornis* is given above. The morphology is illustrated in Fig. 2 and  
377 summarized in Tab. 3.

378

379 Justification of the erection of the subfamily Paulusiellinae

380 The morphology does not provide sufficient guidance for the placement of the genus in a natural  
381 classification. The absence of apparent diagnostic characters is documented by the initial invalid  
382 description of *Paulusiella* in Dascilloidea (Mandl 1974, 1979), the inclusion of an originally karumid  
383 species in the genus (*Escalerina serraticornis* Paulus, 1972; Dascilloidea: Dascillidae), and the recent  
384 description of a *Paulusiella* species in *Selasia* (*Selasia sweithana* Geisthardt, 2009; Elateridae:  
385 Agrypninae: Drilini; Geisthardt 2009; Ivie & Branham 2011). The type-genus *Paulusiella* was validly  
386 erected in Cebriioninae (now Elaterinae: Cebriionini) by Löbl (2007) and later transferred to Elateridae  
387 *incertae sedis* (Ivie & Barclay 2011).

388           Here, *Paulusiella* was recovered with robust support as a sister to *Hemiops* Laporte, 1838 by  
389 all analyses (Fig. 1A, B, 5A–P, Supp. Figs. S2–S11). Hemiopinae is a small elaterid subfamily with  
390 only four genera – *Hemiops* Laporte, 1838 (Figs. 5A–P; East and Southeast Asia), *Legna* Walker,  
391 1858 (Sri Lanka), *Parhemiops* Candèze, 1878 (Nepal) and morphologically somewhat distant  
392 *Exoeolus* Broun, 1893 (New Zealand) (Douglas 2011). Comparing *Paulusiella* and *Hemiops*, we can  
393 see similar abruptly elevated scutellum that is anteriorly straight in *Paulusiella* but bilobate in  
394 *Hemiops* (Figs. 2H, 5M) and similar morphology of trochanters (Figs. 2D, 5B, K; Paulus 1972, Fig.  
395 3). In both taxa, the scutellum posteriorly surpasses the elytral surface, but projected posterior part of  
396 the scutellum is commonly encountered in elateroids. The antennae are different, but the relative  
397 length of the three basal antennomeres is similar (Figs. 2D, 5D). There are several structures that are  
398 present in *Hemiops* and absent in *Paulusiella*: the sharp lateral prothoracic edge (Figs. 2K, 5F),  
399 apparent elytral longitudinal costae (Figs. 2I, 5A), the complex posterior shape of the prothorax (Figs.  
400 2J, M, 5N, O). The taxa also differ in the relative length of the prosternal process, prosternum, shape  
401 of elytra, abdominal terminal segments, and the shape of phallus (Figs. 2A–Q; 5A–P).

402           We prefer to assign the subfamily rank to the *Paulusiella*-based taxon as we cannot propose  
403 any reliable diagnostic character that would morphologically define the clade of all hemiopine genera  
404 and *Paulusiella*.

405  
406  
407

**Tab. 3.** The overview of elaterid morphological characters in the lineages with modified or unknown females and clicking *Hemiopus* sp.

| Character<br>Taxon                     | Male          |                             |                                      |                             |                                              |                       |                                   | Female                                                                                                       |
|----------------------------------------|---------------|-----------------------------|--------------------------------------|-----------------------------|----------------------------------------------|-----------------------|-----------------------------------|--------------------------------------------------------------------------------------------------------------|
|                                        | anten-<br>nae | apical<br>antenna-<br>meres | prosternum/<br>prosternal<br>process | lateral<br>pronotal<br>edge | elytral rows or<br>costae / suture;<br>shape | abdominal<br>segments | mesocox.<br>process<br>(ventr. 1) | Differences when compared with<br>conspecific male                                                           |
| <i>Hemiopus</i><br>(Hemiopinae)        | short         | 10<11                       | long / long,<br>clicking             | present                     | present / full; widest<br>in middle          | connate               | present                           | fully sclerotized, flying, similar<br>male                                                                   |
| <i>Cebrio</i><br>(Elaterinae)          | short         | 10<11                       | short / long,<br>non-clicking        | present                     | absent / divergent,<br>widest basally        | free                  | absent                            | some females with short elytra and<br>wingless; physogastric abdomen,<br>short antennae, and legs (Fig. 4A). |
| <i>Paulusiella</i><br>(Paulusiellinae) | short         | 10<11                       | short / short,<br>non-clicking       | vestige<br>posteriorly      | absent / divergent,<br>widest basally        | free                  | absent                            | unknown                                                                                                      |
| <i>Analestesa</i><br>(Cardiophorinae)  | long          | 10>11                       | long / short,<br>non-clicking        | absent                      | absent / absent;<br>widest basally           | free                  | present                           | unknown                                                                                                      |
| <i>Plastocerus</i><br>(Dendrometrinae) | long          | 10<11                       | long / short,<br>non-clicking        | present                     | present / full;<br>parallel-sided            | free                  | short                             | obtuse posterior pronotal angles,<br>shorter antennae than male                                              |
| <i>Drilus</i><br>(Agrypninae)          | short         | 10<11                       | short / short,<br>non-clicking       | present                     | absent / full suture;<br>widest posteriorly  | free                  | absent                            | head and appendages adult-like,<br>rest of body larviform                                                    |
| <i>Omalisus</i><br>(Omalisinae)        | long          | 10<11                       | short / short,<br>non-clicking       | present                     | present; full suture,<br>parallel-sided      | free                  | absent                            | pupa-like: short legs and antennae,<br>vestigial elytra, similar length of<br>meso- and metathorax           |

426  
427  
428  
429

408  
409  
410  
411  
412  
413  
414  
415  
416  
417  
418  
419  
420  
421  
422  
423  
424  
425

430

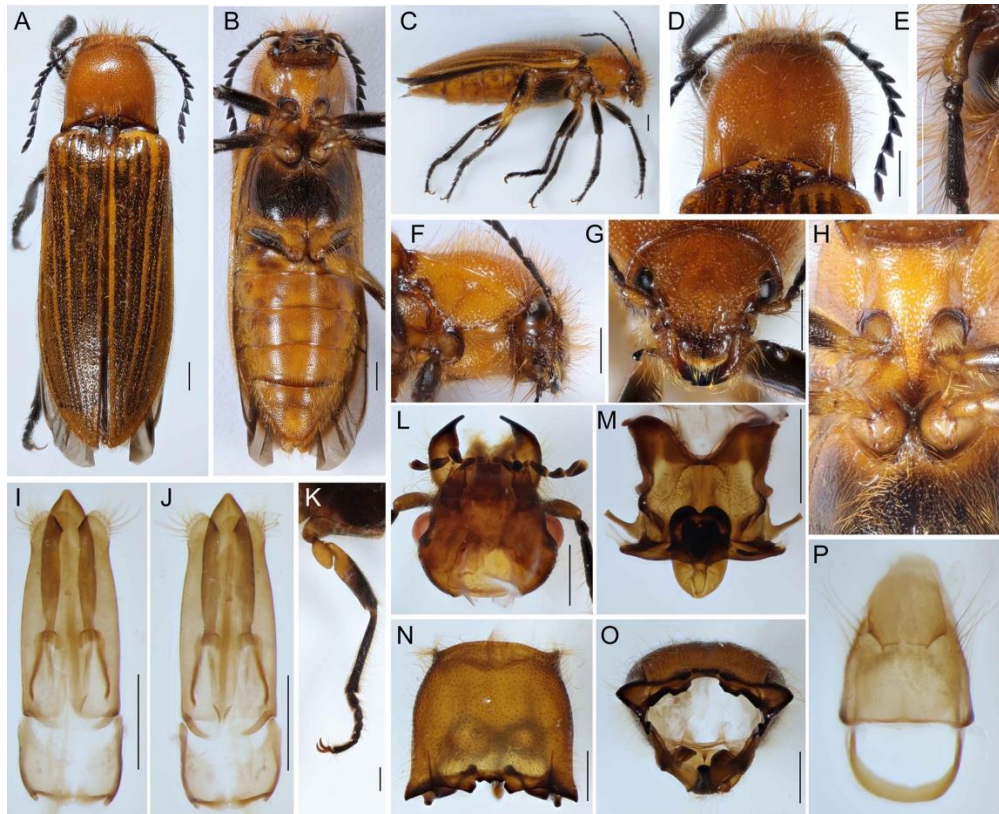

431

432

433 **Fig. 5.** *Hemiopus* sp. from Laos. A–C general appearance, dorsal, ventral, and lateral aspects; D –  
434 pronotum; E – basal antennomeres; F – pronotum and head, ventrolateral view; G – head, dorsally; H  
435 – prosternal process and mesosternal pit; I, J – male genitalia; K – metathoracic leg; L – head  
436 ventrally; M – mesonotum; N, O ° pronotum, dorsal, and posterior view; P – terminal abdominal  
437 segments. Scales 1.0 mm.

438

439 **Subfamily Cardiophorinae Candèze, 1859**

440 *Cardiophorites* Candèze, 1859: 4.

441 *Cardiophori*: LeConte 1861: 166.

442 *Cardiophorinae*: Burakowski et al. 1985: 227.

443

444 Type genus

445 *Cardiophorus* Eschscholtz, 1829.

446

447 =*Aphrici* LeConte, 1861: 173.

448 Type genus: *Aphricus* LeConte, 1853.

449 =*Aptopina* Jakobson, 1913: 760.

450 Type genus: *Aptopus* Eschscholtz, 1829.

451 =*Esthesopinae* Fleutiaux, 1919: 76.

452 Type genus: *Esthesopus* Eschscholtz, 1829.

453 =*Nyctorini* Semenov-Tian-Shanskij et Pjatakova, 1936: 102.

454 Type genus: *Nyctor* Semenov-Tian-Shanskij et Pjatakova, 1936 [= *Cardiophorus* Eschscholtz,  
455 1829 *sensu* Cate (2007) but not Douglas (2017)].

456 =*Cebriognathinae* Paulus, 1981: 264 (recently *Elaterinae*: *Cebrionini* or as a synonym of

457 *Cebrioninae*), **a new synonym of Cardiophorinae.**

458 Type genus: *Cebriognathus* Chobaut, 1899 (= *Analestesa* Leach, 1824).

459

460 Remark

461 The molecular analysis robustly recovered *Analestesa arabica* in close relationships with *Globothorax*  
462 Fleutiaux, 1891 (= *Teslasena* Fleutiaux, 1892), *Cardiophorus* Eschscholtz, 1829, and *Dicronychus*  
463 Brullé, 1832 (Figs. 1A, B, Supp. Figs. S2–S11). The position is also supported by the structure of  
464 male genitalia (Figs. 3K–M). Although Paulus (1981) erected Cebriognathinae within that time  
465 accepted Cebriionidae, he mentioned the here confirmed similarity of the male genitalia of  
466 *Cebriognathus* and Cardiophorinae and discussed the possibility that *Cebriognathus* is a modified  
467 click beetle. Bouchard et al. (2011) listed Cebriognathinae as a synonym of Cebriioninae, and the  
468 GBIF database (<https://www.gbif.org/species/4428817> accessed on Nov. 7, 2022) lists *Analestesa* as a  
469 junior synonym of *Cebrio*. Still, *Analestesa* is a valid name and must be considered one of the  
470 Cardiophorinae genera.

471 *Analestesa* is much less sclerotized than most cardiophorine click beetles and has no clicking  
472 mechanism (Figs. 3A, D). It differs from most Cardiophorinae in a quadrate mesoscutellar shield and  
473 the small and short prosternal process that does not reach the mesothoracic pit. The only  
474 cardiophorine species with weakly sclerotized cuticle has been *Nyctor expallidus* Semenov-Tian-  
475 Shanskij et Pjatakova, 1936 (= *Cardiophorus expallidus*, *sensu* Cate 2007). The males have possibly  
476 slender antennae, and the females shortened, robust antennae. Although Douglas (2017) described  
477 both illustrated specimens as males, the intraspecific variability in the morphology of antennae is  
478 improbable (Douglas 2017; Figs. 60, 61).

479 There are several characters defining Cardiophorinae + Negastrinae and the monophyly of  
480 Cardiophorinae (Douglas 2017) that could be sought in *Analestesa*: the shape of the parameres (Figs.  
481 3K–M) and the straight lateral edge of the prosternum. Another diagnostic character was defined in  
482 female genitalia, but females are unknown for *Analestesa*. The modified external morphology does  
483 not provide evidence for the placement of *Analestesa* in Cardiophorinae, and only the similar male  
484 genitalia support the recovered DNA-based topology. The recovered relationships  
485 (*Globothorax*(*Analestesa*(*Cardiophorus*, *Dicronychus*)) suggest that the earlier proposed morphology-  
486 based topology (*Dicronychus*(*Cardiophorus*, *Globothorax*)) might need further investigation (Douglas  
487 2017).

488

489

490 **Subfamily Elaterinae Leach, 1815**

491 Elaterides Leach, 1815: 85.

492 Type genus: *Elater* Linnaeus, 1758.

493 **Cebriionini Latreille, 1802**

494 Cebriionates Latreille, 1802: 97.

495 Type genus: *Cebrio* Olivier, 1790.

496

497 Remark

498 Females of *Cebrio* have variably developed elytra and large bodies. The known females are flightless  
499 (Fig. 5A; Rattu 2016, Rattu & François, 2021, Martinez-Luque et al. 2022). The females differ from  
500 conspecific males in smaller eyes and a different shape of the cranium, shorter appendages: very short  
501 antennae, with low differentiation between the antennomeres, short legs, with longer femora and  
502 tibiae than tarsi, shortened elytra, and vestigial wings. *Cebrio gigas* (F., 1787) has a physogastric  
503 female but the elytra that form complete elytral suture, although they do not completely cover the  
504 abdomen  
505 ([https://inpn.mnhn.fr/espece/cd\\_nom/240515](https://inpn.mnhn.fr/espece/cd_nom/240515) – accessed on 3 Nov 2022).

506

507 Revised composition of Cebrionini

508 Cebrionina Latreille, 1802: *Cebrion* Olivier, 1790; *Cebriorhipis* Chevrolat, 1875, *Musopsis* Chevrolat,

509 1875, *Scaptolenus* LeConte, 1853; *Selonodon* Latreille, 1834; *Stenocebrion* Solervicens, 1988.

510 Aplastina Stibick, 1979: *Aplastus* LeConte, 1859; *Euthysanius* LeConte, 1853; *Octinodes* Candèze,

511 1863 (= *Plastocerus* LeConte, 1853); *Cylindroderus* Latreille, 1834 (= *Cylindroderoides* Schwarz,

512 1907); *Dodecacius* Schwarz, 1902 (Arnett 1949, Johnson 2002, Sánchez-Ruiz & Löbl 2007, Johnson

513 & Chaboo 2015).

514 Stibick (1979) listed Pleonomini Semenov et Pjatakova, 1936 as a coordinate taxon of

515 Aplastini in Aplastinae. The group was listed as Pleonominae by Cate (2007) and as the tribe

516 Pleonomini in Dendrometrinae by Bouchard et al. (2011). *Pleonomus* Ménétrés, 1849 has both sexes

517 with fully developed elytra but apparent sexual dimorphism (Reitter 1900) resembling the

518 modifications observed in other soft-bodied elaterids.

519

520

## 521 Discussion

522

523 Origins of soft-bodied forms

524 Some fifteen years ago, the Elateridae was a morphologically homogenous beetle family with few

525 slightly modified, weakly sclerotized taxa concentrated in Cebrionini (Elaterinae; Sánchez-Ruiz &

526 Löbl 2007, Lawrence et al. 2011, Bouchard et al. 2011). Until now, cebrionids have served as a

527 collective taxon for at least partly soft-bodied, non-clicking elaterids with flightless or unknown

528 females (Arnett 1949, Johnson 2002, Rattu 2016, Rattu & François 2021, etc.). Since 2007, several

529 DNA-based studies have targeted soft-bodied elateroids. They have advocated that Drilidae,

530 Omalidae, and Plastoceridae (Cantharoidea are modified click beetles (Bocakova et al. 2007,

531 Kundrata & Bocak 2011, Bocak et al. 2018, Kusy et al. 2018). Additionally, the relationships between

532 widely defined Elateridae and lampyroid families were suggested by Kusy et al. (2021). Other studies

533 recovered a similar clade but rejected the monophyly of Elateridae (Zhang et al. 2018, McKenna et al.

534 2019, Douglas et al. 2021).

535 The earlier phylogenetic hypotheses had a clear evolutionary connotation: the shift leading to

536 flightless, soft-bodiedness, the retention of some larva- or pupa-like characters in adults, and even

537 larviform females of some taxa, was understood as a rare phenomenon. Therefore, almost all elateroid

538 lineages with weak sclerotization, including some taxa with neotenic females, shared a hypothesized

539 common ancestor (the Cantharoidea and cantharoid clade concepts; Crowson 1955, 1972, Branham &

540 Wenzel 2003, Lawrence et al. 2011). The rejection of the cantharoid clade (Bocakova et al. 2007,

541 Sagegami-Oba et al. 2007) and the robust placement of some ‘cantharoid’ groups in Elateridae (Kusy

542 et al. 2019) suggested a different view: the process of metamorphosis is less stable than previously

543 thought, and numerous elaterid groups independently lost the clicking mechanism, are soft-bodied

544 (i.e., cantharoid-like), their known females are physogastric, have short appendages, and short,

545 vestigial or absent elytra (Fig. 4A, Tab. 3).

546 Here, we studied the position of two taxa, *Paulusiella* and *Analestesa* (= *Cebriognathus* or

547 *Cebrion*), earlier placed in Elateridae *incertae sedis* or Elaterinae: Cebrionini (Sánchez-Ruiz & Löbl

548 2007, Ivie & Barclay 2011). Both genera are known only in males, and their females are putatively

549 flightless. These are small-bodied, non-clicking, weakly sclerotized beetles, with shortened and

550 posteriorly slender elytra, without a full-length elytral suture and coadaptation between the lateral

551 elytral margins of the abdomen (Figs. 2, 3). Due to these traits, they are superficially similar to some

552 Cebrionini, but the DNA analysis placed them in very distant positions (Figs. 1A, B, Supp. Figs. S2–

553 S11). *Paulusiella serraticornis* was recovered as a sister to Hemipopinae and *Analestesa arabica* as

554 one of the serial splits in Cardiophorinae. These positions are robustly supported by molecular data  
555 (Tab. 2). Conversely, their relationships are hardly supported by morphology (see Results). Still, the  
556 comparative morphology neither clearly supports their relationships to *Cebrio* (Figs. 2–4). Cebriionini,  
557 i.e., *Cebrio*, *Cebriorhipis*, and *Scaptolenus*, contain medium-sized beetles with a characteristically  
558 robust body, short prosternum, fully developed sharp lateral pronotal margin, and seven segments of  
559 the abdomen (Fig. 5; Tab. 3). Small-bodied and weakly sclerotized Aplastini, i.e., *Aplastus*,  
560 *Euthysanius*, and *Octinodes*, are more similar due to small and slender body. Still, all have elaterid-  
561 like pronotum with acutely projected posterior angles. *Selonodon* is an elaterid-like cebriionid (Galley  
562 1999), and *Stenocebrio* is similar in general appearance to *Paulusiella* or *Analestesa* (Solervicens  
563 1988), but the genus was unavailable for the study.

564 Although the divergent morphology is sometimes referred to only as flightlessness and soft-  
565 bodiedness, the morphological modifications affect almost all body parts, and similar modifications  
566 are known in unrelated lineages (e.g., Paulus 1972, Johnston & Gimmel 2020, Tab. 3). Besides  
567 shortened to vestigial elytra and wings, we often notice the shortened antennae and legs; the loss or  
568 substantial simplification of complex structures, e.g., the pronotum (keels, lateral edge, shortened  
569 prosternum, shortened prosternal process, the loss of acutely projected posterior angles, unfunctional  
570 click mechanism), a lower ratio between the length of meta and mesothorax (the female of *Omalisus*;  
571 Bocak & Brlik 2008), free abdominal segments, the loss of inter-coxal keel in visible abdominal  
572 segment 1, loss of costae of rows of punctures in elytra (Figs. 2, 3, 4; Tab. 3).

573 The fully sclerotized elaterids have thick-walled thoracic segments, strong muscles, a  
574 mesosternal pit, long prosternum, and the elytra are held closed by the mesoscutellar catch.  
575 Additionally, the prothorax and mesothorax are coadapted, and pivots and flanges enable precisely  
576 defined click action (Ewans 1972). This complex mechanism is lost in all soft-bodied groups. The  
577 affected groups do not necessarily have all traits modified (e.g., compare the antennal length of  
578 *Analestesa* and *Paulusiella*; Figs. 2D, 3I), but the presence of these characters is often recorded in the  
579 males of elateroid taxa for which we have proved or hypothesized the modified, flightless females  
580 (Crowson 1972, Cicero 1988, Bocakova et al. 2007, Bocek et al. 2018, Kundrata & Bocak 2019, Kusy  
581 et al. 2019, Rosa et al. 2020).

582 The phylogenetic distribution of non-flying and soft-bodied groups is biased to Elateroidea or  
583 Elateriformia, respectively (Gould 1977, McMahon & Hayward 2016). Within click beetles, modified  
584 forms are known in Elaterinae: Cebriionini, Omalisinae, Dendrometrinae: Plastocerini, and  
585 Agrypninae: Drilini (Bocakova et al. 2007, Kundrata & Bocak 2011, Bocak et al. 2018, Bocek et al.  
586 2018, Kusy et al. 2019). The relationships of *Analestesa* and *Paulusiella* are hypothesized as further  
587 two independent origins of these modifications: Paulusiellinae is a sister to Hemioptinae, and  
588 *Analestesa* is one of the numerous genera of Cardiophorinae (Figs. 1A, B, Supp. Figs. S2–S11).  
589 Similar phenotypes are known in the lampyroid families. Telegeusinae (Omethidae), which are  
590 closely related to Armatopodidae, and Jurasaidae, related to Eucnemidae and Cerophytidae, are  
591 further examples of the independent origin of soft-bodied forms (Bocakova et al. 2007, Bocak et al.  
592 2014, Zhang et al. 2018, McKenna et al. 2019, Rosa et al. 2020). An additional case of lost  
593 sclerotization was hypothesized in Ptilodactylidae, which now contains one morphologically modified  
594 species, earlier the type of Podabrocephalidae (Kundrata et al. 2019). Analogical modifications were  
595 also reported in one species of *Anorus* (Dascillidae; Johnston & Gimmel 2020) and other dascillids  
596 (Karumiinae; Paulus 1972). We suppose, in agreement with earlier studies, that the morphological  
597 modifications result from earlier termination of metamorphosis that strongly affects females but also  
598 has some effect on males (Gould 1977, Bocak et al. 2008, McMahon & Hayward 2016, etc.).

599  
600  
601



## 602 Modified morphology and systematics

603 The modification caused by incomplete metamorphosis (i.e., the retention of some larval  
604 characters and the loss of some derived traits) leads to two kinds of taxonomic misplacements. These  
605 beetles are often merged into a single clade as the modifications have a similar effect on unrelated  
606 lineages. Then, the morphological analyses using the parsimony criterion prefer these shared  
607 characters before fewer, if any, contradicting characters shared with close, yet unmodified, relatives.  
608 In such a way, earlier authors defined taxa as Cantharoidea and the cantharoid clade (Crowson 1972,  
609 Lawrence et al. 2011), the subfamily Cebrioninae or the tribe Cebrionini (Arnett 1949, Bouchard et al.  
610 2011), the clade of neotenic lineages in net-winged beetles (Kazantsev, 2013), or suggested  
611 *Podabrocephalus* Pic, 1913 (Byrrhoidea) as a sister of the cantharoid clade (Lawrence et al. 2011).  
612 Additionally, some taxa were initially placed in distantly related but similarly modified groups. For  
613 example, Paulus (1972) described *Paulusiella serraticornis* as *Escalerina serraticornis* in Dascillidae,  
614 and Geisthardt (2009) described *P. sweihana* in *Selasia* (Agrypninae: Drilini; Ivie & Barclay 2011).

615 The unrealistically deep rooting of modified forms is a second kind of misplacement. The loss  
616 of derived character states leads to the inference of a deeper position of incompletely metamorphosed  
617 groups than those of their fully sclerotized relatives. Consequently, the inappropriately high rank is  
618 given to modified lineages. This effect led to the earlier discussion on the ancient origin of neotenic  
619 (Crowson 1972, Kazantsev 2005), the proposed sister-relationships of *Selonodon* Latreille  
620 (Cebrionini) and other elaterids (Lawrence et al. 2011) or descriptions of elaterid subfamilies  
621 Pleonominae (=Pleonomini, Dendrometrinae) and Nyctorini (=Cardiophorinae). The absence of  
622 female characters in the analyzed matrices (unknown or sometimes completely larviform females)  
623 lowers the number of informative characters coded for neotenic taxa. Then, missing data negatively  
624 affect the stability of phylogenies.

625 The above-described pitfalls cannot be solved by any methodological modification of the  
626 morphology-based phylogenetic analyses. The earlier analyses handled many taxa and characters and  
627 were correctly conducted by experienced comparative morphologists (Branham & Wenzel 2003,  
628 Lawrence et al. 2011). In these groups, we urgently need information unaffected by pedogenetic  
629 syndrome. Now, we can access information-rich genetic data and reinvestigate the traditionally  
630 accepted relationships. The growing evidence suggests common shifts from the clicking, well-  
631 sclerotized elaterids to weakly sclerotized forms with highly modified females (Figs. 1A, B, Supp.  
632 Figs. Figs. S2–S11). We can look for similar evolutionary pathways in other groups and test the new  
633 hypotheses with even more extensive data in the future. The striking conflict between morphology-  
634 and DNA-based relationships of extant lineages also calls for cautious analyses of soft-bodied forms  
635 preserved in amber deposits, as their relationships cannot be validated with molecular data.

636

## 637 Acknowledgments

638 We are very obliged to Vit Kuban (Brno, Czech Republic), the late Willi Büttiker (Basel,  
639 Switzerland), Dirk Ahrens, and the late Sylvia Fabrizzi (Bonn, Germany) for providing the critical  
640 specimens for the DNA isolation. We thank R. Rattu (Cagliari, Italy) for permission to use his  
641 photograph of a *Cebrio* female (Fig. 5A).

642

## 643 Authors' contribution and funding

644 Conceptualization, L.B., D.K., M.M.; molecular analyses, M.M., D.K.; writing, original draft  
645 preparation, D.K. M.M., L.B.; comparative morphology, L.B.; reviewing and editing, all co-authors;  
646 visualization, L.B., M.M.; funding acquisition, L.B., M.M., D.K. All authors have read and agreed to  
647 the published version of the manuscript. This research was funded by The Czech Science Foundation,  
648 grant number 22-35327S (L.B., M.M., and D.K.), and the authors.

649

650 **Conflict of interest**

651 None declared.

652

653 **Data availability statement**

654 The analyzed sequences are available in the Mendeley depository. Kusy, Dominik; Motyka, Michal;  
655 Bocak, Ladislav (2023), "Data for „Ontogenetic modifications produce similar phenotypes in distantly  
656 related click beetles (Coleoptera: Elateridae),” DOI:10.17632/73dmw4czm3.1.

657

658 **References**

- 659 Arnett, R. H., Jr. 1949. Notes on the Genera Included in the Family Cebrionidae (Coleoptera). *Coleopt. Bull.* 3(4): 49–54.
- 660 Bernt, M., Donath, A., Jühling, F., Externbrink, F., Florentz, C., Fritzsch, G.; Pütz, J., Middendorf, M., and Stadler, P. F.  
661 2013. MITOS: Improved de novo metazoan mitochondrial genome annotation. *Mol. Phylogenet. Evol.* 69: 313–  
662 319.
- 663 Bininda-Emonds, O. 2005. TransAlign: Using amino acids to facilitate the multiple alignment of protein-coding DNA  
664 sequences. *BMC Bioinform.* 6: 156.
- 665 Bocak, L., Grebennikov, V. V., and Masek, M. 2013. A new species of *Dexoris* (Coleoptera: Lycidae) and parallel evolution  
666 of brachyptery in the soft-bodied elateroid beetles. *Zootaxa.* 3721(5): 495–500.
- 667 Bocak, L., Bocakova, M., Hunt, T., and Vogler, A. P. 2008. Multiple ancient origins of neoteny in Lycidae (Coleoptera):  
668 consequences for ecology and macroevolution. *Proc. R. Soc. B: Biol. Sci.* 275: 2015–2023.
- 669 Bocak, L., Motyka, M., Bocek, M., and Bocakova, M. 2018. Incomplete sclerotization and phylogeny: The phylogenetic  
670 classification of *Plastocerus* (Coleoptera: Elateroidea). *PLoS One.* 13(3): e0194026.
- 671 Bocak, L. and Brlik, M. 2008. Revision of the family Omalidae (Coleoptera, Elateroidea). *Ins. Syst. Evol.* 39(2): 189–212.
- 672 Bocakova, M., Bocak, L., Hunt, T., Teraväinen, M., and Vogler, A. P. 2007. Molecular phylogenetics of Elateriformia  
673 (Coleoptera): evolution of bioluminescence and neoteny. *Cladistics.* 23: 1–20.
- 674 Bocek, M., Fancello, L., Motyka, M., Bocakova, M., and Bocak, L. 2018. The molecular phylogeny of Omalidae  
675 (Coleoptera) defines the family limits and demonstrates low dispersal propensity and the ancient vicariance  
676 patterns. *Syst. Entomol.* 43, 250–261.
- 677 Bouchard, P.; Bousquet, Y.; Davies, A. E.; Alonso-Zarazaga, M. A.; Lawrence, J. F.; Lyal, C. H. C.; Newton, A. F.; Reid, C.  
678 A. M.; Schmitt, M.; Ślipiński, S. A.; et al. 2011. Family-group names in Coleoptera (Insecta). *ZooKeys.* 88: 1–972.
- 679 Branham, M. A. and Wenzel, J. W. 2003. The evolution of photic behavior and the evolution of sexual communication in  
680 fireflies (Coleoptera: Lampyridae). *Cladistics.* 84: 565–586.
- 681 Broun, T. 1893. *Manual of the New Zealand Coleoptera.* Parts V–VII George Didsbury, Wellington, New Zealand, pp. 975–  
682 1504.
- 683 Brullé, A. 1832. *La partie des insectes dans l'ouvrage de la commission scientifique de Morée.* Levrault, Paris, Tab. 22, 64–  
684 400.
- 685 Burakowski, B., Mroczkowski, M., and Stefańska, J. 1985. *Chrzęszcze Coleoptera, Buprestoidea, Elateroidea and*  
686 *Cantharoidea. Katalog Fauny Polski. Część XXIII, tom 10 [Nr 40].* Państwowe Wydawnictwo Naukowe,  
687 Warszawa, 401 pp.
- 688 Candèze, E. C. A. 1859. *Monographie des Élatérides.* Tome second. H. Dessain, Liège, 543 pp. + 7 pls.
- 689 Candèze, E. C. A. 1863. *Monographie des Élatérides.* Vol. 4. *Mém. Soc. Roy. Sci. Liège* 17: 1–534. 6 plates.
- 690 Candèze, E. C. A. 1878. *Élatérides nouveaux.* *Ann. Soc. Entomol. Belg.* 21: li–lxi, lxxv–lxxxv, cxxxv–cxlxii, clxi–clxxii,  
691 clxxxix–cxcix.
- 692 Cate, P. C. 2007. Family Elateridae (part), pp 89–209. In: Löbl I, Smetana A (Eds) *Catalogue of Palaearctic Coleoptera,*  
693 *Vol. 4. Elateroidea-Derodontoidea-Bostrichoidea-Lymexyloidea-Cleroidea-Cucujoidea.* Apollo Books, Stenstrup,  
694 935 pp.
- 695 Cicero, J. M. 1988. Ontophylogenetics of cantharoid larviforms (Coleoptera: Cantharoidea). *Coleopt. Bull.* 42: 105–151
- 696 Chen, S., Zhou, Y., Chen, Y., and Gu, J. 2018. Fastp: An ultra-fast all-in-one FASTQ preprocessor. *Bioinformatics* 34: i884–  
697 i890.
- 698 Chernomor, O., von Haeseler, A., and Minh, B. Q. 2016. Terrace aware data structure for phylogenomic inference from  
699 supermatrices. *Syst. Biol.* 65: 997–1008.
- 700 Chevrolat, A. 1875. Révision des Cébrionides. *Annales de la Société Entomologique de France* (5)4(1874): 9–38, 363–426,  
701 507–540, pl. 1.
- 702 Chobaut, A. 1899. Description d'un genre nouveau de Cébrionides du Sahara septentrional [Col.]. *Bull. Soc. Ent. France.*  
703 1899: 22–23.
- 704 Crowson, R. A. 1955. *The Natural Classification of the Families of Coleoptera.* Nathaniel Lloyd, London.

- 705 Crowson, R. A. 1972. A review of the classification of Cantharoidea (Coleoptera), with definition of two new families  
706 Cneoglossidae and Omethidae. *Rev. Univ. Compl. Madrid*. 21: 35–77.
- 707 Crowson, R.A. 1981. *The Biology of the Coleoptera*. Academic Press, London.
- 708 Dierckxsens, N., Mardulyn, P., and Smits, G. 2017. NOVOPlasty: De novo assembly of organelle genomes from whole  
709 genome data. *Nucl. Acids Res.* 45: e18.
- 710 Douglas, H. 2011. Phylogenetic relationships of Elateridae inferred from adult morphology, with special reference to the  
711 position of Cardiophorinae. *Zootaxa* 2900, 1–45.
- 712 Douglas, H. 2017. World reclassification of the Cardiophorinae (Coleoptera, Elateridae), based on phylogenetic analyses of  
713 morphological characters. *ZooKeys* 655: 1–130.
- 714 Douglas, H. B., Kundrata, R., Brunke, A.J., Escalona, H. E., Chapados, J. T., Eyres, J., Richter, R., Savard, K., Ślipiński, A.,  
715 McKenna, D., and Dettman, J. R. 2021. Anchored Phylogenomics, Evolution and Systematics of Elateridae: Are  
716 All Bioluminescent Elateroidea Derived Click Beetles? *Biology*. 2021, 10, 451.
- 717 Eschscholtz, J. F. 1829. Elaterites, Eintheilung derselben in Gattungen. *Entomol. Arch.* 2: 31–35.
- 718 Evans, M. E. G. 1972. The jump of the click beetle (Coleoptera, Elateridae) – a preliminary study. *J. Zool.* 167: 319–336.
- 719 Fleutiaux, E. 1892. Note sur les Physodactylini. *Annales de la Société Entomologique de France* 61: 403–412, pl. 8.
- 720 Fleutiaux, E. 1919. Elateridae, Trixagidae et Melasidae. In *Voyage de Ch. Alluaud et R Jeannel en Afrique Orientale (1911–*  
721 *1912). Résultats scientifiques. Insectes Coléoptères*. Vol. 13. Lhomme, Paris, 119 pp.
- 722 Galley, K. E. M. 1999. Revision of the genus *Selonodon* Latreille (Coleoptera: Cebrionidae). *Occ. Pap. Florida State Coll.*  
723 *Arthr.* 10: 1–48.
- 724 Geisthardt, M. 2009. *Order Coleoptera, family Drilidae. Arthropod fauna of the UAE* Volume 2, pp. 159–163. Dar Al  
725 Ummah Printing, Abu Dhabi.
- 726 Gould, S. J. 1977. *Ontogeny and Phylogeny*. Harvard University Press, Cambridge.
- 727 Hoang, D. T., Chernomor, O., von Haeseler, A., Minh, B. Q., and Vinh, L. S. 2018. UFBoot2: Improving the ultrafast  
728 bootstrap approximation. *Mol. Biol. Evol.* 35: 518–522.
- 729 Ivie, M. A. and Barclay, M. V. L. 2011. The Familial Placement and Specific Membership of *Escalerina* Bolívar Y Pieltain  
730 and *Paulusiella* Löbl (Coleoptera: Elateridae, Dascillidae, Drilidae), with New Synonymies. *Coleopt. Bull.* 65:  
731 167–172.
- 732 Jakobson, G. G. 1913. [Fasc. 10: pp. 721–864] In: Zhuki Rossii i Zapadnoi Evropy. A. F. Devrien, St. Petersburg, 1024 pp. +  
733 83 pls.
- 734 Jindra, M., Uhlířova, M., Charles, J. P., Smykal, V., and Hill, R. J. 2015. Genetic Evidence for Function of the bHLH-PAS  
735 Protein Gce/Met As a Juvenile Hormone Receptor. *PLoS Genetics*. 11(7): 1005394.
- 736 Jindra, M. 2019. Where did the pupa come from? The timing of juvenile hormone signalling supports homology between  
737 stages of hemimetabolous and holometabolous insects. *Phil. Trans. R. Soc. B – Biol. Sci.* 374 (1783): 20190064.
- 738 Johnson, P. J. 2002. 63. Elateridae. In Arnett, R. H. Jr., and Thomas M. C., eds. *American Beetles*. CRC Press, Gainesville,  
739 Florida.
- 740 Johnson, P. J. and Chaboo, C. S. 2015. Beetles (Coleoptera) of Peru: A Survey of the Families. Elateridae Leach, 1815. J.  
741 *Kans. Entomol. Soc.* 88(2): 269–272.
- 742 Johnston, M. A. and Gimmel, M. L. 2020. Review of North American Dascillidae (Coleoptera: Dascilloidea), with  
743 descriptions of dramatic female wing reduction. *Coleopt. Bull.* 74(4): 731–757.
- 744 Kalyaanamoorthy, S., Minh, B. Q., Wong, T. K. F., von Haeseler, A., and Jermini, L. S. 2017. ModelFinder: Fast model  
745 selection for accurate phylogenetic estimates. *Nat. Meth.* 14: 587–589.
- 746 Katoh, K. and Standley, D. M. 2013. MAFFT multiple sequence alignment software version 7: Improvements in  
747 performance and usability. *Mol. Biol. Evol.* 30: 772–780.
- 748 Kazantsev, S. V. 2013. New and little known taxa of neotenic Lycidae (Coleoptera), with discussion of their phylogeny.  
749 *Russ. Entomol. J.* 22: 9–31.
- 750 Kishino, H. and Hasegawa, M. 1989. Evaluation of the maximum likelihood estimate of the evolutionary tree topologies  
751 from DNA sequence data, and the branching order in hominoidea. *J. Mol. Evol.*, 29: 170–179.
- 752 Kishino, H., Miyata, T. and Hasegawa, M. 1990. Maximum likelihood inference of protein phylogeny and the origin of  
753 chloroplasts. *J. Mol. Evol.*, 31: 151–160.
- 754 Kück, P., Meid, S. A., Gross, C., Wägele, J. W. and Misof, B. 2014. AliGROOVE—Visualization of heterogeneous  
755 sequence divergence within multiple sequence alignments and detection of inflated branch support. *BMC*  
756 *Bioinform.* 15: 294.
- 757 Kundrata, R. and Bocak, L. 2011. The phylogeny and limits of Elateridae (Insecta, Coleoptera): is there a common tendency  
758 of click beetles to soft-bodiedness and neoteny? *Zool. Scr.* 40(4): 364–378.
- 759 Kundrata, R., Bocakova, M., and Bocak L. 2014. The comprehensive phylogeny of Elateroidea (Coleoptera): molecular  
760 evidence for evolution of soft-bodiedness, neoteny and bioluminescence. *Mol. Phylog. Evol.* 76: 162–171.

- 761 Kundera R. and Bocak, L. 2019. Molecular phylogeny reveals the gradual evolutionary transition from full sclerotization to  
762 soft-bodiedness in the click-beetles and identifies Sub-Saharan Africa as a cradle of diversity for Drilini. *Zool. J.*  
763 *Linn. Soc.* 187: 413–452.
- 764 Kundera, R., Ivie, M. A., and Bocak, L. 2019. *Podabrocephalus* Pic is the morphologically modified lineage of  
765 Ptilodactylinae (Coleoptera: Elateriformia: Ptilodactylidae). *Ins. Syst. Evol.* 50: 147–161.
- 766 Kusy, D., Motyka, M., Bocek, M., Vogler, A. P., and Bocak, L., 2018. Genome sequences identify three families of  
767 Coleoptera as morphologically derived click beetles (Elateridae). *Sci. Rep.* 8: 17084.
- 768 Kusy, D., Motyka, M., Bocek, M., Masek, M., and Bocak, L. 2019. Phylogenomic analysis resolves the relationships among  
769 net-winged beetles (Coleoptera: Lycidae) and reveals the parallel evolution of morphological traits. *Syst. Ent.* 44:  
770 911–925.
- 771 Kusy, D., He, J. W., Bybee, S. M., Motyka, M., Bi, W. X., Podsiadlowski, L., Li, X. Y., and Bocak, L. 2021. Phylogenomic  
772 relationships of bioluminescent elateroids define the ‘lampyroid’ clade with clicking Sinopyrophoridae as its  
773 earliest member. *Syst. Entomol.* 46(1): 111–123.
- 774 Kusy, D., Motyka, M., and Bocak, L. 2021. Click Beetle Mitogenomics with the Definition of a New Subfamily Hapatesinae  
775 from Australasia (Coleoptera: Elateridae). *Insects.* 12: 17.
- 776 Laporte de Castelnau, F. L. 1838. Études entomologiques, ou descriptions d’insectes nouveaux et observations sur la  
777 synonymie. Quatrième tribu. Élatérides. *Rev. Entomol.* 4(1)[1836]: 5-60.
- 778 Lartillot, N., Rodrigue, N., Stubbs, D., and Richer, J. 2013. PhyloBayes MPI: Phylogenetic reconstruction with infinite  
779 mixtures of profiles in a parallel environment. *Syst. Biol.* 62: 611–615.
- 780 Latreille, P. A. 1802. *Histoire naturelle, générale et particulière des crustacés et des insectes. Ouvrage faisant suite à*  
781 *l’histoire naturelle générale et particulière, composée par Leclerc de Buffon, et rédigée par C.S. Sonnini, membre*  
782 *de plusieurs sociétés savantes. Familles naturelles des genres.* Tome troisième. F. Dufart, Paris, pp. xii+13–467.
- 783 Latreille, P. A. 1834. Ouvrage posthume de M. Latreille. Distribution méthodique et naturelle des genres de diverses tribus  
784 d’insectes coléoptères, de la famille des Serricornes. *Ann. Soc. Entomol. France.* 3(1): 113–170.
- 785 Lawrence, J. F. 1988. Rhinorrhypidae, a new beetle family from Australia, with comments on the phylogeny of the  
786 Elateriformia. *Invertebr. Tax.* 2: 1–53.
- 787 Lawrence, J. F., Slipinski, A., Seago, A. E., Thayer, M. K., Newton, A. F., and Marvaldi, A. E. 2011. Phylogeny of the  
788 Coleoptera based on morphological characters of adults and larvae. *Ann. Zool.* 61: 1–217.
- 789 Leach, W. E. 1815. Entomology [pp. 57–172]. In: Brewster, D. (Ed). *Brewster’s Edinburgh Encyclopedia.* Volume IX [part  
790 I]. W. Blackwood, J. Waugh, etc., Edinburgh, 764 pp.
- 791 Leach, W. E. 1824. Monograph of the Cebrionidae, a family of Insects. *Zool. J.* 1: 33–45.
- 792 LeConte, J. L. 1853. Revision of the Elateridae of the United States. *Trans. Amer. Phil. Soc.* 10: 405–508.
- 793 LeConte, J. L. 1859. Catalogue of the Coleoptera of Fort Tejon, California. *Proc. Acad. Nat. Sci. Philadelphia.* 1859: 69–90.
- 794 LeConte, J. L. 1861. *Classification of the Coleoptera of North America.* Part I. [pp. 1–208]. Smithsonian Miscellaneous  
795 Collections 3 (No. 136): xxiv + 214 pp.
- 796 Linnaeus, C. 1758. *Systema Naturae per regna tria naturae, secundum classes, ordines, genera, species, cum characteribus,*  
797 *differentiis, synonymis, locis.* Editio decima, reformata [10th revised edition], vol. 1: 824 pp. Laurentius Salvius:  
798 Holmiae.
- 799 Löbl, I. 2007. New nomenclatural and taxonomic acts, and comments. Elateridae: Cebrioninae. In Löbl, I. and Smetana, A.  
800 (Eds) *Catalogue of Palaearctic Coleoptera. Vol. 4. Elateroidea - Derodontoidea - Bostrichoidea - Lymexyloidea -*  
801 *Cleroidea - Cucujoidea.* Apollo Books, Stenstrup, Denmark, 935 pp.
- 802 Løvtrup, S. 1978. Von Baerian and Haeckelian recapitulation. *Syst. Zool.* 27: 348–352.
- 803 McKenna, D. D., S. Shin, D. Ahrens, M. Balke, C. Beza-Beza, D. J. Clarke, A. Donath, H. E. Escalona, F. Friedrichh, H.  
804 Letsch, et al. 2019. The evolution and genomic basis of beetle diversity. *Proc. Nat. Acad. Sci. U. S. A.* 116:  
805 24729–24737.
- 806 McMahon, D. P. and Hayward, A. 2016. Why grow up? A perspective on insect strategies to avoid metamorphosis. *Ecol.*  
807 *Entomol.* 41: 505–515.
- 808 Makarov, K. V. and Kazantsev, S. V. 2022. Larva, Pupa or Adult? The Female of *Platerodrilus* Case (Coleoptera: Lycidae).  
809 *Diversity-Basel* 14: 1063.
- 810 Mandl, K. 1974. Eine neue Gattung, drei neue Arten und eine neue Unterart aus der Familie Karumiidae (Dascilloidea,  
811 Col.). *Verhandlungen der Naturforschenden Gesellschaft in Basel* 84: 635–645.
- 812 Mandl, K. 1979. Eine neue *Paulusiella*-art aus Persia (Karumiidae, Col.). *Koleopt. Rundsch.* 54: 57–59.
- 813 Martinez-Luque, E.O., Jones, R. W., and Nino-Maldonado, S. 2022. New species, notes on the biology of *Scaptolenus*  
814 LeConte (Coleoptera: Elateridae), and a key to the “*vagans*-group”. *Zootaxa* 5169 (3): 267–278.
- 815 Masek, M., Ivie, M. A., Palata, V., and Bocak, L. 2014. Molecular Phylogeny and classification of Lyropaeini (Coleoptera:  
816 Lycidae) with description of larvae and new species of *Lyropaeus*. *Raffl. Bull. Zool.* 62: 136–145.

- 817 Masek, M., Palata, V., Bray, T. C., and Bocak, L. 2015. Molecular Phylogeny Reveals High Diversity, Geographic Structure  
818 and Limited Ranges in Neotenic Net-Winged Beetles *Platerodrilus* (Coleoptera: Lycidae). PLoS One. 10:  
819 0123855.
- 820 Ménétriés, M. 1849. Catalogue des insectes recueillis par feu M Lehman avec les descriptions des nouvelles espèces. Mem.  
821 L'Acad. Imp. Sci. Saint-Petersbourg. 6(7)2: 17–66.
- 822 Minh, B. Q., Schmidt, H. A., Chernomor, O., Schrempf, D., Woodhams, M. D., von Haeseler, A., and Lanfear, R. 2020. IQ-  
823 TREE 2: New models and efficient methods for phylogenetic inference in the genomic era. Mol. Biol. Evol. 37:  
824 1530–1534.
- 825 Mortazavi, A., Hajiqanbar, H., and Saboori, A. 2011. A new species of the family Trochometridiidae (Acari:  
826 Heterostigmatina) associated with *Paulusiella* sp. (Coleoptera: Elateridae) from Iran. Zootaxa. 2746: 57–68.
- 827 Nicholson, D. B., Ross, A. J., and Mayhew, P. J. 2014. Fossil evidence for key innovations in the evolution of insect  
828 diversity. Proc. R. Soc. B – Biol.Sci. 281: 20141823.
- 829 Olivier, G. A. 1790. *Entomologie, ou histoire naturelle des insectes, avec leurs caractères génériques et spécifiques, leur*  
830 *description, leur synonymie et leur figure enluminée. Coléoptères.* Tome second. Baudouin, Paris. Vol. 2 (nos.9–  
831 34).
- 832 Paulus, H. F. 1972. Die systematische und phylogenetische Stellung der Karumiidae, mit einer Beschreibung von *Escalerina*  
833 *serraticornis* n. sp. aus S-Persien (Ins.: Coleoptera: Cantharoidea). Senckenb. Biol. 53: 37–54.
- 834 Paulus, H. F. 1981. *Insects of Saudi Arabia.* Coleoptera, Fam. Cebriionidae: *Cebriognathus persicus* nov. spec. und *C.*  
835 *arabicus* nov. spec., zwei neue Cebriionidae (Cebriognathinae nov. subfam.) aus dem mittleren Osten (Col.,  
836 Elateroidea) - Fauna of Saudi Arabia (Basel), Vol. 3, 257–265.
- 837 Rattu, R. 2016. Contributo alla conoscenza delle femmine delle specie sarde di *Cebrio* (Coleoptera, Elateridae, Elaterinae,  
838 Cebriionini). Ann. Mus. Civ. Stor. Natur. “G. Doria.” 108: 235–248.
- 839 Rattu, R. and François, A. 2021. A new species of *Cebrio* (*Tibesia*) from Errachidia province and geonomic notes on some  
840 species from East and South-East of Morocco (Coleoptera, Elateridae, Elaterinae, Cebriionini). Bol. Mus. Stor.  
841 Natur. Venezia. 72: 21–30.
- 842 Reitter, E. 1900. Übersicht der mir bekannten Arten Coleopteren-(Elateriden-)Gattung *Pleonomus* Mén. aus Central Asien.  
843 Entomol. Nachr. 26: 87–89.
- 844 Ribak, G. and Weihs, D. 2011. Jumping without Using Legs: The Jump of the Click-Beetles (Elateridae) Is Morphologically  
845 Constrained. PLoS One. 6(6): e20871.
- 846 Rosa, S. P., Costa, C., Kramp, K., and Kundrata, R. 2020. Hidden diversity in the Brazilian Atlantic rainforest: the discovery  
847 of Jurasaidae, a new beetle family (Coleoptera, Elateroidea) with neotenic females. Sci. Rep. 10: 1544.
- 848 Sagegami-Oba, R., Takahashi, N., and Oba, Y. 2007. The evolutionary process of bioluminescence and aposematism in  
849 cantharoid beetles (Coleoptera: Elateroidea) inferred by the analysis of 18S ribosomal DNA. Gene. 400: 104–113.
- 850 Sánchez-Ruiz, A. and Löbl, I. 2007. Elateridae: Cebriioninae Latreille, 1802. Pp. 89–93. In Löbl, I. and Smetana, A. (Eds)  
851 *Catalogue of Palaearctic Coleoptera. Volume 4. Elateroidea - Derodontoidea - Bostrichoidea - Lymexyloidea -*  
852 *Cleroidea - Cucujoidea.* Apollo Books, Stenstrup, Denmark, 935 pp.
- 853 Schwarz, O. 1902. Neue Elateriden. Stett. Ent. Ztg. 63: 194–316.
- 854 Schwarz, O. 1907. Fam. Elateridae. Fascicle 46. C. In Wytzman P. (ed.) *Genera Insectorum, Coleoptera.* P. Wytzman,  
855 Bruxelles. Pp. 225–370, 6 pls.
- 856 Semenov-Tian-Shanskij, A. P. and Pjatakova, V. 1936. Sur un genre irrédit, représentant une nouvelle tribu dans la famille  
857 Elateridae (Coleoptera). Čas. České spol. entomol. 33(3): 101–103.
- 858 Shimodaira, H. 2002. An Approximately unbiased test of phylogenetic tree selection. Syst. Biol. 51: 492–508.
- 859 Shimodaira, H. and Hasegawa, M. 1999. Multiple Comparisons of log-likelihoods with applications to phylogenetic  
860 inference. Mol. Biol. Evol. 16: 1114.
- 861 Solervicens, J. 1988. *Stenocebrio coquimbensis* (Coleoptera: Cebriionidae), nuevo género y especie primera cita esta familia  
862 para Chile. Rev. Chil. Entomol. 16: 15–21.
- 863 Steenwyk, J. L., Buida, T. J., Li, Y., Shen, X.-X., and Rokas, A. 2020. ClipKIT: A multiple sequence alignment trimming  
864 software for accurate phylogenomic inference. PLoS Biol. 18: e3001007.
- 865 Stibick, J. N. L. 1979. Classification of the Elateridae (Coleoptera). Relationships and classification of the subfamilies and  
866 tribes. Pac. Ins. 20: 145–186.
- 867 Strimmer, K. and Rambaut, A. 2002. Inferring confidence sets of possibly misspecified gene trees. Proc. Biol. Sci. 2002,  
868 269:137–142.
- 869 Thomas, K. Wong, F., Kalyaanamoorthy, S., Meusemann, K., Yeates, D. K., Misof, B., Jermiin L. S. 2020. A minimum  
870 reporting standard for multiple sequence alignments, NAR Genom. Bioinform. 2(2): lqaa024
- 871 Walker, F. 1858. Characters of some apparently undescribed Ceylon insects. Ann. Mag. Nat. Hist. (3)2: 202–209, 280–286.
- 872 Wong, A. T. C. 1996. A new species of neotenic beetle, *Duliticola hoiseni* (Insecta: Coleoptera: Cantharoidea: Lycidae),  
873 from Peninsular Malaysia and Singapore. Raffl. Bull. Zool. 41: 173–187.

874 Zhang, S. Q., Che, L.-H., Li, Y., Liang, D., Pang, H., Ślipiński, A., and Zhang, P. 2018. Evolutionary history of Coleoptera  
875 revealed by extensive sampling of genes and species. *Nat. Comm.* 9: 205.  
876  
877  
878  
879  
880  
881  
882  
883  
884  
885  
886  
887  
888  
889  
890  
891  
892  
893  
894  
895  
896  
897  
898  
899  
900  
901  
902  
903  
904  
905  
906  
907  
908  
909  
910  
911  
912  
913  
914  
915  
916  
917  
918  
919  
920  
921  
922  
923  
924  
925  
926  
927  
928  
929  
930
